# Supplementary material
Source: PubMed Central journal article supplement (PMC4478793)
Supplement: supp_fj.14-268276_Supplemental_Figure1.pdf [file supp_fj.14-268276_Supplemental_Figure1.pdf]

# Figure S1

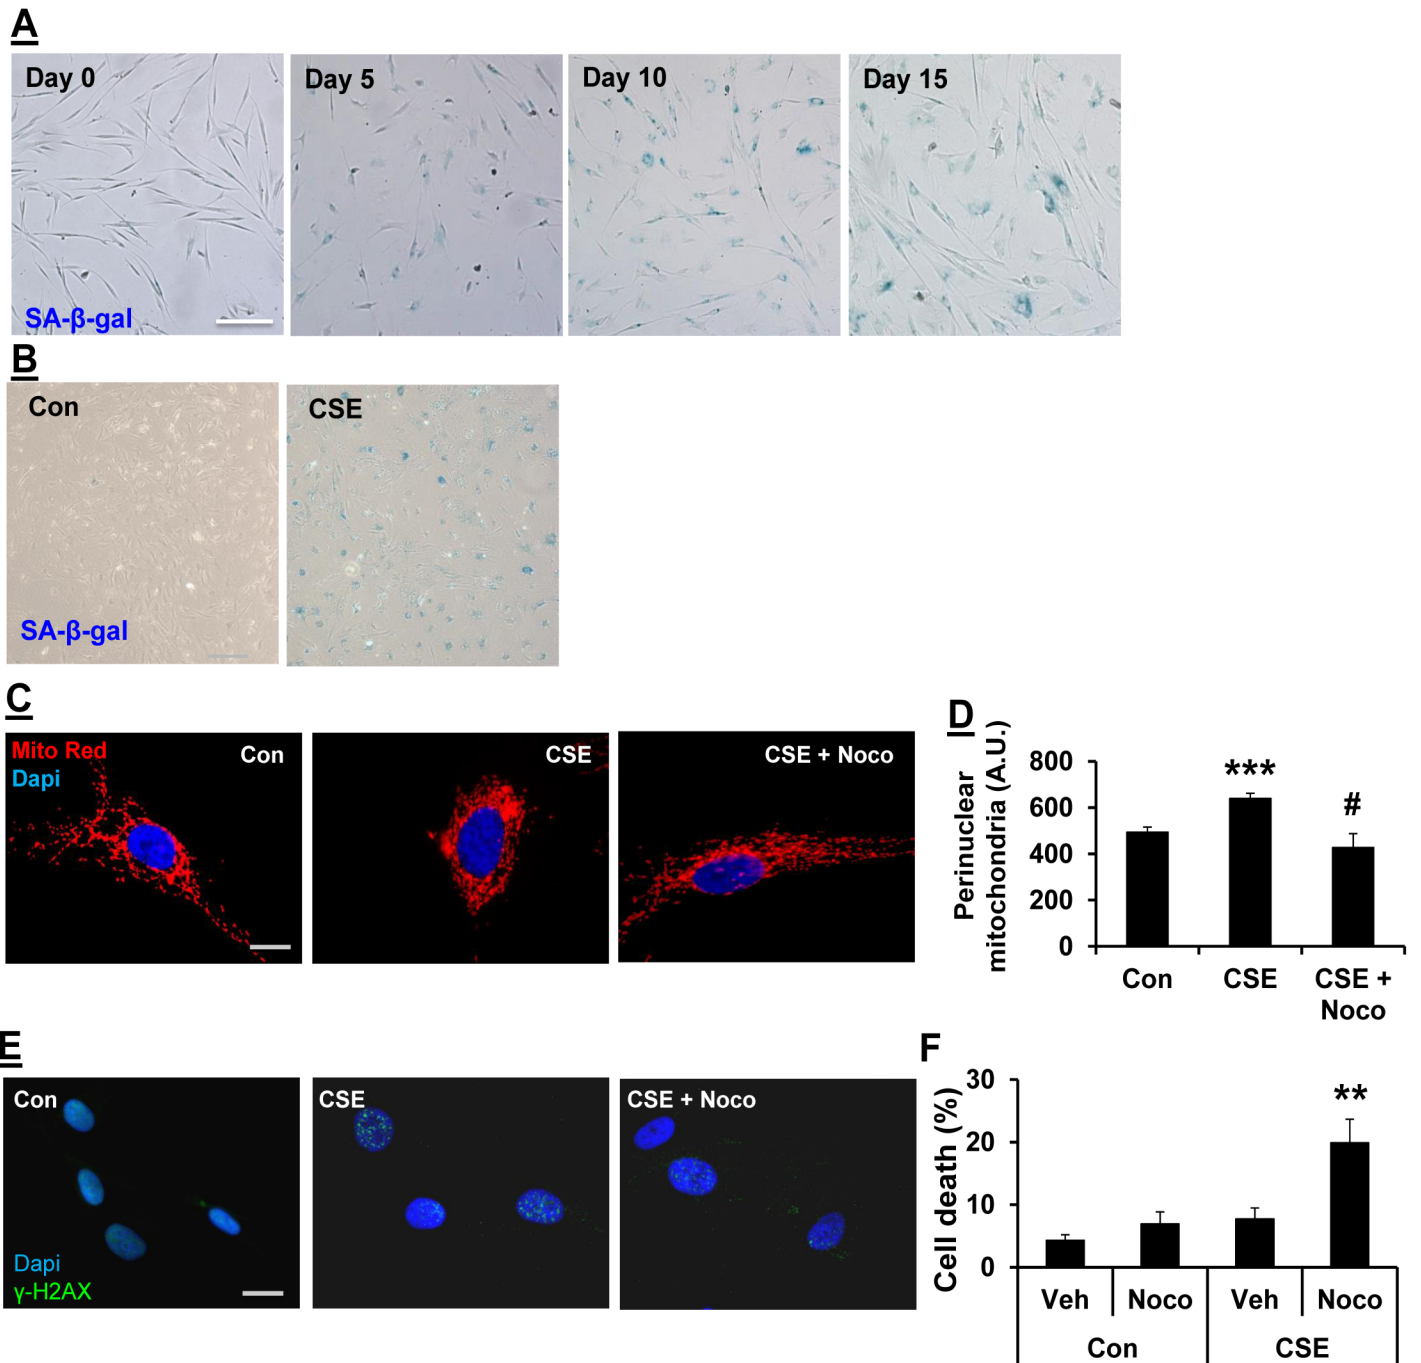

## Figure S1. CSE induces cellular senescence and DNA damage in fibroblasts

(A) Representative images of SA-β-gal activity in human lung fibroblasts (HFL1) with and without alternate day of CSE (0.5%) treatment at indicated time points. Scale bars: 100 μm. (B) Representative images of SA-β-gal activity in mouse lung fibroblasts with and without alternate day of CSE (0.25%) treatment for 15 days. Scale bars: 100 μm. (C) Representative images of perinuclear mitochondria accumulation in HFL1 cells with and without CSE treatment (0.75%) for 24 h. Cells were stained with Tom 20 (red) and DAPI (blue). Nocodazole (Noco) was used (50 nM) to inhibit perinuclear mitochondria accumulation. Scale bars: 20 μm. (D) Average perinuclear mitochondria accumulation. \*\*\* $P < 0.001$  vs control (Con), and # $P < 0.05$  vs CSE. (E) Representative images of HFL1 cells stained with γ-H2AX (green) and DAPI (blue). (F) Cell death measurement by acridine orange and propidium iodide staining in HFL1 cells treated with or without nocodazole (50 nM) and CSE (0.5% for 10 days), \*\* $P < 0.01$  vs control (Con). Data are represented as mean ± s.e.m. with  $n = 4$ .
