# Supplementary material
Source: PubMed Central journal article supplement (PMC4478793)
Supplement: supp_fj.14-268276_Supplemental_Figure2.pdf [file supp_fj.14-268276_Supplemental_Figure2.pdf]

## Figure S2

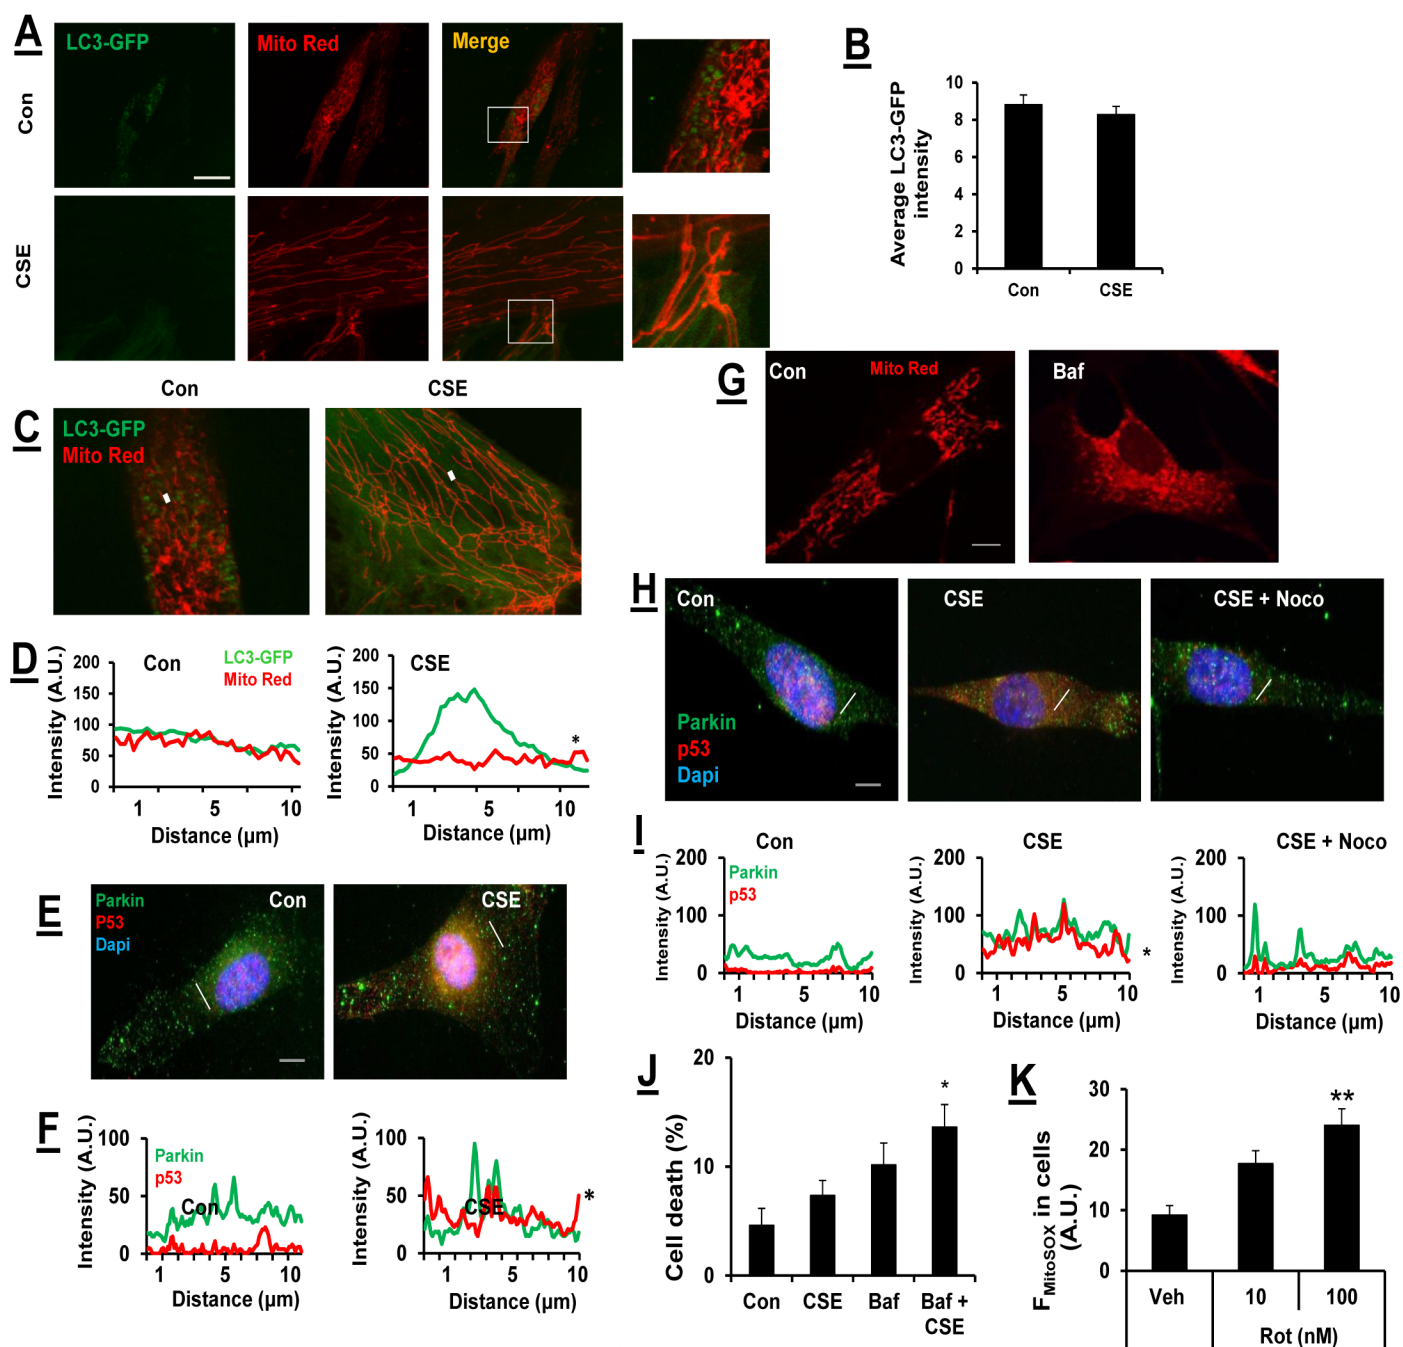

### Figure S2. CSE treatment impairs mitophagy in fibroblasts

(A) Images showing LC3-GFP expressing cells stained with mitotracker red. Cells were treated with CSE (0.5%) for 15 days. Scale bars: 20  $\mu$ m. Areas in squares are zoomed as shown on right panel. (B) Average fluorescent intensity of LC3-GFP was measured by Metamorph. (C) Higher magnification of cells showing colocalization of LC3-GFP with mitochondria (green punctate seen in control slide). (D) Corresponding line scan showing the co-localization of LC3-GFP with mitochondria (red),  $*P < 0.05$  vs control. (E) Representative images of Parkin (green) and p53 (red) in HFL1 cells treated with or without CSE (0.5%) for 15 days. Scale bars: 20  $\mu$ m. (F) Corresponding lines showed co-localization of Parkin (green) with p53 (red),  $*P < 0.05$  vs control. (G) Representative images of mouse lung fibroblasts treated with bafilomycin (Baf, 10 nM for 10 days, alternatively). Cells were stained with mitotracker red (red), scale bars: 10  $\mu$ m. (H) Representative images of Parkin (green) and p53 (red) in HFL1 cells treated with nocadazole in the presence or absence of CSE (0.75%) for 24 h. Scale bars: 20  $\mu$ m. (I) Corresponding line scan showing co-localization of Parkin (green) with p53 (red),  $*P < 0.05$  vs control. (J) Measurement of cell death using acridine orange and propidium iodide in cells treated with or without baf (10 nM for 10 days) and CSE (0.25% for 10 days, alternatively).  $*P < 0.05$  vs control (Con). (K) Average fluorescent intensity ( $F_{\text{MitoSOX}}$ ) of mitochondrial ROS (mtROS) in mouse lung fibroblasts treated with different concentrations of rotenone (Rot, 15 days alternate treatment).  $**P < 0.01$  vs vehicle (Veh). Data are represented as mean  $\pm$  SEM,  $n = 3$ . Slanting lines on images (C, E and H) indicate the areas assessed for fluorescence intensity.
