# Supplementary material
Source: PubMed Central journal article supplement (PMC4478793)
Supplement: supp_fj.14-268276_Supplemental_Figure3.pdf [file supp_fj.14-268276_Supplemental_Figure3.pdf]

**Figure S3**

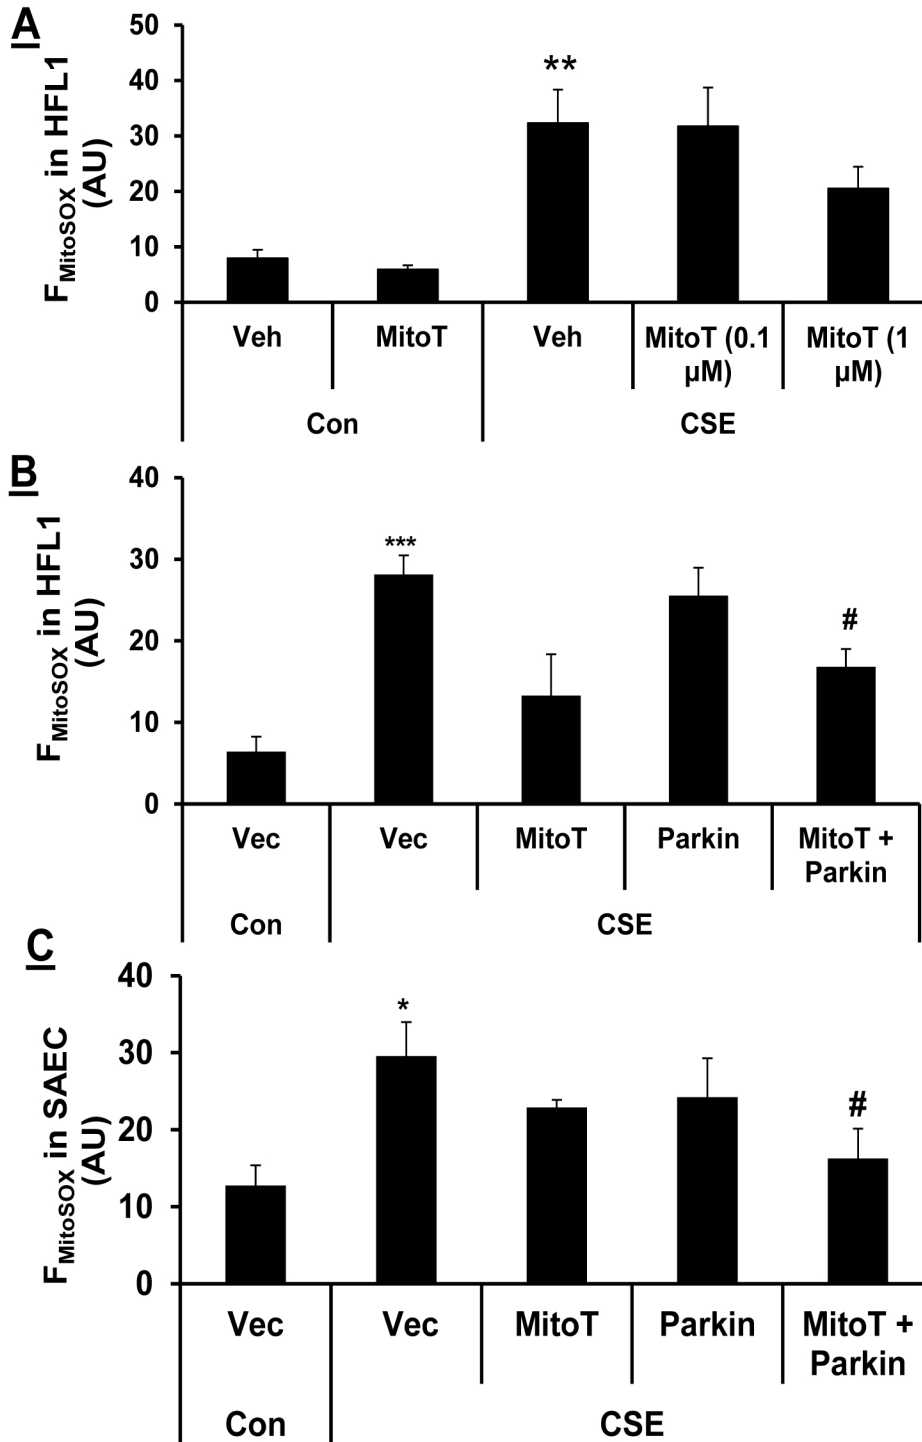

**Figure S3. Mito-Tempo reduces mitochondrial ROS production in HFL1 cells**

(A) FACS data represented as average mtROS intensity (F<sub>MitoSOX</sub>) showing the mitochondrial ROS in HFL1 cells treated with different concentrations of Mito-Tempo. Cells were treated with CSE (0.75%) for 24 h. \*\**P*<0.01 vs control (Con). (B) FACS data represented as average mtROS intensity (F<sub>MitoSOX</sub>) in HFL1 cells with or without Parkin overexpression (Parkin). \*\*\**P*<0.001 vs control (Con) + vector (Vec), and #*P*<0.05 vs CSE + Vec. (C) FACS data represented as average mtROS intensity (F<sub>MitoSOX</sub>) in SAECs with or without Parkin overexpression (Parkin). \**P*<0.05 vs Con + vector, and #*P*<0.05 vs CSE + vector. Data are represented as mean ± s.e.m. with n = 3-4.
